# Supplementary material for: Novel live cell fluorescent probe for human-induced pluripotent stem cells highlights early reprogramming population
Source: PubMed Central journal article supplement (PMC7866770; doi:10.1186/s13287-021-02171-6), 2021-02-05
Supplement: 13287_2021_2171_MOESM9_ESM.pdf [file 13287_2021_2171_MOESM9_ESM.pdf]

**Table S1:** List of the 386 genes differentially expressed in DiPS, DPSC, BDL-E5+, BDL-E5-

| Gene ID           | Gene Symbol | DiPS | DPSC  | BDL-E5+ | BDL-E5- | p value  |
|-------------------|-------------|------|-------|---------|---------|----------|
| ENSG0000029153.10 | ARNTL2      | 0.00 | 0.04  | 0.37    | 4.82    | 0.0188   |
| ENSG0000030304.8  | MUSK        | 0.00 | 0.54  | 0.03    | 9.01    | 0.0089   |
| ENSG0000059378.8  | PARP12      | 0.00 | 19.17 | 9.55    | 86.06   | 0.0148   |
| ENSG0000068724.11 | TTC7A       | 0.00 | 15.83 | 1.33    | 40.91   | 0.04115  |
| ENSG0000069869.11 | NEDD4       | 0.00 | 5.41  | 5.13    | 42.48   | 0.00865  |
| ENSG0000076258.5  | FMO4        | 0.00 | 9.28  | 0.00    | 1.25    | 0.00815  |
| ENSG0000090975.8  | PITPNM2     | 0.00 | 8.28  | 0.19    | 6.26    | 0.02695  |
| ENSG0000102078.11 | SLC25A14    | 0.00 | 54.00 | 1.34    | 146.61  | 0.001    |
| ENSG0000109667.7  | SLC2A9      | 0.00 | 0.00  | 1.26    | 0.00    | 5.00E-05 |
| ENSG0000117152.9  | RGS4        | 0.00 | 0.00  | 0.45    | 0.00    | 0.0056   |
| ENSG0000119725.13 | ZNF410      | 0.00 | 0.26  | 30.07   | 0.61    | 0.0031   |
| ENSG0000123243.10 | ITIH5       | 0.00 | 1.29  | 0.00    | 0.64    | 0.00055  |
| ENSG0000130382.7  | MLLT1       | 0.00 | 16.41 | 0.00    | 104.61  | 5.00E-05 |
| ENSG0000134007.3  | ADAM20      | 0.00 | 0.00  | 5.27    | 0.00    | 0.02535  |
| ENSG0000134539.12 | KLRD1       | 0.00 | 0.00  | 0.54    | 0.00    | 0.0143   |
| ENSG0000135362.9  | PRR5L       | 0.00 | 5.56  | 0.80    | 21.84   | 0.00695  |
| ENSG0000138772.8  | ANXA3       | 0.00 | 0.00  | 3.12    | 128.24  | 0.0193   |
| ENSG0000141255.8  | SPATA22     | 0.00 | 0.00  | 0.00    | 0.69    | 0.0098   |
| ENSG0000143127.8  | ITGA10      | 0.00 | 2.80  | 0.58    | 0.00    | 0.01655  |
| ENSG0000148444.11 | COMMD3      | 0.00 | 63.25 | 35.07   | 273.40  | 0.03705  |
| ENSG0000152128.13 | TMEM163     | 0.00 | 0.00  | 0.00    | 68.59   | 5.00E-05 |
| ENSG0000154678.12 | PDE1C       | 0.00 | 6.75  | 35.24   | 6.84    | 0.0365   |
| ENSG0000158806.9  | NPM2        | 0.00 | 0.00  | 0.00    | 32.06   | 6.00E-04 |
| ENSG0000159314.7  | ARHGAP27    | 0.00 | 0.00  | 0.00    | 2.70    | 0.001    |
| ENSG0000161681.11 | SHANK1      | 0.00 | 0.00  | 0.00    | 0.55    | 0.00055  |
| ENSG0000164463.8  | CREBRF      | 0.00 | 7.45  | 19.68   | 0.95    | 0.0135   |
| ENSG0000167136.6  | ENDOG       | 0.00 | 3.97  | 2.83    | 0.00    | 0.03695  |
| ENSG0000167925.11 | GHDC        | 0.00 | 3.88  | 0.03    | 50.77   | 3.00E-04 |
| ENSG0000168405.10 | CMAHP       | 0.00 | 0.01  | 0.00    | 211.45  | 5.00E-05 |
| ENSG0000172733.10 | PURG        | 0.00 | 0.19  | 0.00    | 4.09    | 0.04485  |
| ENSG0000173083.10 | HPSE        | 0.00 | 0.00  | 0.43    | 30.85   | 0.048    |
| ENSG0000178685.9  | PARP10      | 0.00 | 2.15  | 0.97    | 214.51  | 0.03005  |
| ENSG0000183644.9  | C11orf88    | 0.00 | 2.26  | 0.67    | 0.00    | 0.01075  |
| ENSG0000184588.13 | PDE4B       | 0.00 | 37.02 | 10.35   | 158.90  | 0.0108   |
| ENSG0000186998.11 | EMID1       | 0.00 | 0.00  | 0.00    | 0.40    | 0.0085   |
| ENSG0000196843.11 | ARID5A      | 0.00 | 46.00 | 4.66    | 131.21  | 0.0251   |
| ENSG0000197182.8  | FLJ27365    | 0.00 | 3.53  | 0.49    | 23.02   | 0.036    |

|                   |                |      |       |       |        |         |
|-------------------|----------------|------|-------|-------|--------|---------|
| ENSG00000197584.7 | KCNMB2         | 0.00 | 0.00  | 0.00  | 0.59   | 0.02015 |
| ENSG00000198520.6 | C1orf228       | 0.00 | 0.00  | 0.00  | 79.96  | 0.04935 |
| ENSG00000205746.5 | RP11-1212A22.1 | 0.00 | 0.00  | 0.00  | 2.11   | 0.0332  |
| ENSG00000206127.6 | GOLGA8O        | 0.00 | 0.92  | 1.75  | 0.00   | 0.04085 |
| ENSG00000215527.3 | AP005482.1     | 0.00 | 0.00  | 0.00  | 333.91 | 0.0039  |
| ENSG00000218996.1 | RP1-99E18.2    | 0.00 | 0.00  | 0.00  | 4.86   | 0.04195 |
| ENSG00000224080.1 | UBE2FP1        | 0.00 | 0.58  | 0.00  | 1.16   | 0.017   |
| ENSG00000224623.1 | RP11-247I13.8  | 0.00 | 0.00  | 2.28  | 0.00   | 0.02075 |
| ENSG00000225383.2 | SFTA1P         | 0.00 | 0.00  | 0.00  | 11.76  | 0.0279  |
| ENSG00000225920.2 | RIMKLBP2       | 0.00 | 0.00  | 2.14  | 0.00   | 0.01615 |
| ENSG00000227953.2 | RP11-439E19.3  | 0.00 | 3.29  | 1.70  | 0.00   | 0.0181  |
| ENSG00000229052.2 | RP11-386I23.1  | 0.00 | 0.66  | 0.91  | 0.00   | 0.02955 |
| ENSG00000229124.2 | VIM-AS1        | 0.00 | 0.02  | 0.53  | 0.00   | 0.01325 |
| ENSG00000229325.1 | ACAP2-IT1      | 0.00 | 0.00  | 14.51 | 0.00   | 0.03095 |
| ENSG00000229692.3 | SOS1-IT1       | 0.00 | 0.00  | 0.00  | 10.49  | 0.0421  |
| ENSG00000229808.1 | RP11-456P18.2  | 0.00 | 0.00  | 0.91  | 0.00   | 0.0258  |
| ENSG00000230001.1 | RP11-70J12.1   | 0.00 | 2.82  | 12.54 | 0.00   | 0.03395 |
| ENSG00000232116.2 | RP11-187C18.2  | 0.00 | 15.03 | 0.00  | 11.70  | 0.04865 |
| ENSG00000234636.1 | MED14-AS1      | 0.00 | 0.00  | 0.00  | 1.40   | 0.0281  |
| ENSG00000237654.1 | AP003025.2     | 0.00 | 1.14  | 0.00  | 22.22  | 0.04965 |
| ENSG00000237803.1 | LINC00211      | 0.00 | 0.00  | 0.00  | 0.29   | 0.03995 |
| ENSG00000238113.2 | RP11-262H14.1  | 0.00 | 0.28  | 0.00  | 3.42   | 0.0337  |
| ENSG00000240695.1 | RP11-102M11.1  | 0.00 | 20.15 | 0.00  | 1.77   | 0.03325 |
| ENSG00000241295.1 | ZBTB20-AS2     | 0.00 | 12.76 | 23.50 | 0.00   | 0.0494  |
| ENSG00000242154.1 | RP4-778K6.3    | 0.00 | 0.00  | 12.86 | 0.00   | 0.045   |
| ENSG00000243251.4 | PGBD3          | 0.00 | 9.15  | 13.42 | 0.00   | 0.0263  |
| ENSG00000243305.1 | RP11-362A9.3   | 0.00 | 1.72  | 0.00  | 4.01   | 0.01435 |
| ENSG00000248664.1 | CTC-498J12.3   | 0.00 | 0.00  | 0.00  | 0.40   | 0.0166  |
| ENSG00000249593.2 | CTB-46B19.2    | 0.00 | 0.00  | 0.32  | 0.00   | 0.0388  |
| ENSG00000251381.2 | LINC00958      | 0.00 | 0.00  | 0.28  | 0.00   | 0.0079  |
| ENSG00000255139.1 | AP000442.1     | 0.00 | 0.00  | 0.00  | 178.60 | 0.0076  |
| ENSG00000256025.1 | CACNA1C-AS4    | 0.00 | 4.99  | 0.00  | 41.02  | 0.0065  |
| ENSG00000256390.1 | AC092143.1     | 0.00 | 0.00  | 0.41  | 0.00   | 0.01655 |
| ENSG00000256469.1 | RP11-856F16.2  | 0.00 | 1.63  | 0.00  | 6.09   | 0.0419  |
| ENSG00000258978.1 | HIF1AP1        | 0.00 | 0.00  | 0.00  | 124.37 | 0.01085 |
| ENSG00000259948.2 | RP11-326A19.5  | 0.00 | 0.00  | 0.68  | 0.00   | 0.02955 |

|                    |                |      |         |        |        |          |
|--------------------|----------------|------|---------|--------|--------|----------|
| ENSG00000260946.1  | RP11-407G23.3  | 0.00 | 27.94   | 0.00   | 74.33  | 0.0244   |
| ENSG00000261355.1  | RP11-698N11.4  | 0.00 | 0.17    | 2.90   | 0.00   | 5.00E-05 |
| ENSG00000261777.1  | RP11-529K1.2   | 0.00 | 0.00    | 0.70   | 0.00   | 0.0238   |
| ENSG00000262211.1  | CTD-2031P19.5  | 0.00 | 0.00    | 4.09   | 0.00   | 0.0189   |
| ENSG00000267395.1  | AC074212.6     | 0.00 | 7.25    | 2.62   | 0.00   | 0.02365  |
| ENSG00000267515.1  | RP11-861E21.3  | 0.00 | 0.00    | 27.81  | 0.00   | 0.0282   |
| ENSG00000267811.1  | RP11-727F15.11 | 0.00 | 1.03    | 6.34   | 0.00   | 0.011    |
| ENSG00000269997.1  | RP11-214K3.21  | 0.00 | 0.00    | 0.00   | 211.50 | 0.0488   |
| ENSG00000272533.1  | SNORA28        | 0.00 | 0.00    | 519.97 | 0.00   | 0.0036   |
| ENSG00000272991.1  | AF129408.17    | 0.00 | 31.84   | 31.93  | 0.00   | 0.0139   |
| ENSG00000273297.1  | RP11-38M8.1    | 0.00 | 0.76    | 7.39   | 0.00   | 0.0271   |
| ENSG00000273384.1  | RP5-1098D14.1  | 0.00 | 0.00    | 0.00   | 138.30 | 0.01545  |
| ENSG00000271741.1  | ZMYM6          | 0.00 | 0.03    | 1.77   | 0.00   | 0.04815  |
| ENSG00000250802.2  | ZBED3-AS1      | 0.00 | 0.00    | 1.41   | 0.00   | 0.0187   |
| ENSG00000172716.12 | SLFN11         | 0.00 | 4.19    | 23.14  | 0.40   | 0.0229   |
| ENSG00000196724.8  | ZNF418         | 0.00 | 0.98    | 0.00   | 0.77   | 0.01825  |
| ENSG00000107738.15 | C10orf54       | 0.00 | 49.53   | 55.13  | 11.04  | 0.0382   |
| ENSG00000155066.11 | PROM2          | 0.00 | 0.00    | 0.00   | 0.42   | 0.00015  |
| ENSG00000144810.11 | COL8A1         | 0.01 | 24.25   | 27.76  | 110.32 | 0.03055  |
| ENSG00000163412.8  | EIF4E3         | 0.01 | 1.09    | 1.39   | 0.07   | 0.01515  |
| ENSG00000113296.10 | THBS4          | 0.01 | 0.00    | 0.00   | 12.35  | 0.0023   |
| ENSG00000123552.13 | USP45          | 0.01 | 2.64    | 17.58  | 1.72   | 0.01925  |
| ENSG00000137809.12 | ITGA11         | 0.01 | 54.05   | 43.73  | 178.38 | 0.03325  |
| ENSG00000175787.12 | ZNF169         | 0.02 | 0.01    | 0.00   | 2.61   | 0.0192   |
| ENSG00000105605.3  | CACNG7         | 0.02 | 0.05    | 0.00   | 0.43   | 0.0316   |
| ENSG00000198690.5  | FAN1           | 0.02 | 0.49    | 2.89   | 0.25   | 0.03     |
| ENSG00000142794.14 | NBPF3          | 0.02 | 4.98    | 0.05   | 0.37   | 0.01015  |
| ENSG00000006283.13 | CACNA1G        | 0.03 | 0.04    | 0.00   | 0.58   | 0.0013   |
| ENSG00000132256.14 | TRIM5          | 0.03 | 37.19   | 1.75   | 38.68  | 0.0078   |
| ENSG00000213073.4  | RP11-288H12.3  | 0.03 | 0.00    | 0.00   | 36.39  | 0.00625  |
| ENSG00000214176.5  | PLEKHM1P       | 0.04 | 5.89    | 0.01   | 4.55   | 0.0222   |
| ENSG00000135297.11 | MTO1           | 0.04 | 0.16    | 0.87   | 34.48  | 0.0013   |
| ENSG00000259571.1  | BLID           | 0.04 | 104.78  | 2.91   | 0.00   | 0.03145  |
| ENSG00000110756.13 | HPS5           | 0.05 | 0.26    | 33.82  | 6.38   | 0.04325  |
| ENSG00000239713.3  | APOBEC3G       | 0.05 | 0.13    | 3.51   | 0.04   | 0.03025  |
| ENSG00000159403.11 | C1R            | 0.06 | 1182.24 | 205.29 | 848.86 | 0.0167   |
| ENSG00000112769.14 | LAMA4          | 0.07 | 121.77  | 38.18  | 340.15 | 0.00175  |
| ENSG00000142330.15 | CAPN10         | 0.07 | 30.00   | 0.78   | 165.69 | 5.00E-05 |

|                    |                |      |        |        |         |          |
|--------------------|----------------|------|--------|--------|---------|----------|
| ENSG00000256594.3  | RP11-705C15.2  | 0.07 | 0.66   | 0.00   | 4.84    | 0.0411   |
| ENSG00000138639.13 | ARHGAP24       | 0.07 | 0.00   | 85.90  | 0.34    | 0.00665  |
| ENSG00000181938.9  | GINS3          | 0.08 | 0.07   | 0.00   | 0.64    | 0.0057   |
| ENSG00000219470.1  | RP3-337H4.6    | 0.08 | 0.17   | 0.83   | 0.00    | 0.0459   |
| ENSG00000272899.1  | RP11-309L24.9  | 0.08 | 0.15   | 9.22   | 0.00    | 0.00605  |
| ENSG00000134802.13 | SLC43A3        | 0.09 | 0.14   | 1.48   | 0.06    | 0.0071   |
| ENSG00000204991.6  | SPIRE2         | 0.09 | 3.73   | 0.00   | 0.37    | 0.00115  |
| ENSG00000261552.1  | RP11-264B17.5  | 0.09 | 27.02  | 0.00   | 64.44   | 0.0378   |
| ENSG00000235865.2  | GSN-AS1        | 0.10 | 5.55   | 0.08   | 9.57    | 0.04845  |
| ENSG00000183023.14 | SLC8A1         | 0.11 | 19.12  | 3.02   | 65.61   | 0.0257   |
| ENSG00000146373.12 | RNF217         | 0.11 | 8.19   | 1.31   | 6.25    | 0.02805  |
| ENSG00000121964.10 | GTDC1          | 0.11 | 4.26   | 2.52   | 76.83   | 0.0119   |
| ENSG00000203836.7  | NBPF24         | 0.13 | 0.04   | 0.00   | 2.79    | 0.02085  |
| ENSG00000175984.10 | DENND2C        | 0.15 | 0.01   | 0.48   | 9.77    | 0.0095   |
| ENSG00000119681.7  | LTBP2          | 0.16 | 8.83   | 5.10   | 44.40   | 0.01055  |
| ENSG00000269242.1  | CTD-2192J16.22 | 0.18 | 7.03   | 35.91  | 0.00    | 0.02355  |
| ENSG00000183655.11 | KLHL25         | 0.18 | 0.14   | 0.00   | 1.15    | 0.0423   |
| ENSG00000196159.7  | FAT4           | 0.18 | 8.16   | 4.10   | 16.21   | 0.03155  |
| ENSG00000167972.9  | ABCA3          | 0.20 | 0.00   | 0.00   | 2.58    | 0.0303   |
| ENSG00000140471.12 | LINS           | 0.21 | 78.54  | 0.50   | 82.48   | 0.01345  |
| ENSG00000235034.2  | C19orf81       | 0.22 | 2.90   | 0.00   | 0.74    | 0.0489   |
| ENSG00000138134.7  | STAMBPL1       | 0.22 | 0.01   | 0.00   | 7.50    | 0.03875  |
| ENSG00000151883.12 | PARP8          | 0.23 | 0.00   | 0.01   | 0.26    | 0.00025  |
| ENSG00000183405.5  | RPS7P1         | 0.23 | 0.21   | 0.54   | 0.00    | 0.03545  |
| ENSG00000213707.2  | HMGB1P10       | 0.23 | 0.48   | 0.00   | 5.47    | 0.01645  |
| ENSG00000204084.8  | INPP5B         | 0.23 | 0.54   | 0.65   | 17.81   | 0.03345  |
| ENSG00000160469.12 | BRSK1          | 0.24 | 0.00   | 0.00   | 1.25    | 0.0152   |
| ENSG00000072518.16 | MARK2          | 0.26 | 0.18   | 1.14   | 24.73   | 0.02035  |
| ENSG00000146263.7  | MMS22L         | 0.27 | 0.25   | 0.00   | 5.45    | 5.00E-05 |
| ENSG00000021645.13 | NRXN3          | 0.30 | 0.02   | 8.17   | 0.00    | 5.00E-05 |
| ENSG00000185278.10 | ZBTB37         | 0.30 | 2.64   | 0.01   | 0.59    | 0.02725  |
| ENSG00000139926.11 | FRMD6          | 0.35 | 26.83  | 55.29  | 458.21  | 0.00925  |
| ENSG00000223953.3  | C1QTNF5        | 0.36 | 204.94 | 201.46 | 1600.38 | 0.00135  |
| ENSG00000166311.5  | SMPD1          | 0.38 | 94.15  | 112.34 | 585.07  | 0.02725  |
| ENSG00000129657.10 | SEC14L1        | 0.40 | 19.75  | 73.50  | 19.64   | 0.03895  |
| ENSG00000105483.12 | CARD8          | 0.45 | 22.43  | 0.66   | 14.91   | 0.02     |
| ENSG00000161958.6  | FGF11          | 0.51 | 1.71   | 0.33   | 18.23   | 0.0171   |
| ENSG00000167615.12 | LENG8          | 0.54 | 24.86  | 1.75   | 177.96  | 0.01025  |
| ENSG00000160828.13 | STAG3L2        | 0.58 | 9.10   | 0.27   | 5.50    | 0.0252   |
| ENSG00000260793.2  | RP5-882C2.2    | 0.63 | 2.04   | 3.70   | 0.00    | 0.01455  |
| ENSG00000106648.9  | GALNTL5        | 0.64 | 0.06   | 0.00   | 0.67    | 0.0041   |

|                    |               |      |        |        |        |         |
|--------------------|---------------|------|--------|--------|--------|---------|
| ENSG00000157869.10 | RAB28         | 0.64 | 1.06   | 14.07  | 73.16  | 0.0405  |
| ENSG00000158773.10 | USF1          | 0.69 | 13.14  | 13.84  | 0.00   | 0.022   |
| ENSG00000229809.4  | ZNF688        | 0.72 | 5.79   | 0.76   | 40.82  | 0.013   |
| ENSG00000232931.1  | LINC00342     | 0.73 | 6.33   | 8.56   | 64.96  | 0.02945 |
| ENSG00000141576.10 | RNF157        | 0.84 | 0.00   | 0.51   | 0.01   | 0.04825 |
| ENSG00000255248.2  | RP11-166D19.1 | 0.86 | 138.45 | 33.59  | 207.41 | 0.0227  |
| ENSG00000118762.3  | PKD2          | 0.86 | 28.76  | 39.41  | 8.30   | 0.0392  |
| ENSG00000147457.9  | CHMP7         | 0.88 | 11.38  | 37.02  | 4.23   | 0.0461  |
| ENSG00000106608.12 | URGCP         | 0.89 | 1.17   | 51.04  | 0.35   | 0.0022  |
| ENSG00000162928.8  | PEX13         | 0.95 | 4.92   | 4.36   | 146.84 | 0.0077  |
| ENSG00000090674.11 | MCOLN1        | 1.05 | 60.52  | 0.76   | 19.86  | 0.0332  |
| ENSG00000073711.6  | PPP2R3A       | 1.11 | 6.57   | 4.59   | 29.75  | 0.04325 |
| ENSG00000229153.1  | EPHA1-AS1     | 1.12 | 0.24   | 5.52   | 0.00   | 0.00925 |
| ENSG00000232586.1  | RP11-46A10.4  | 1.16 | 0.06   | 0.00   | 0.58   | 0.01455 |
| ENSG00000122481.12 | RWDD3         | 1.21 | 63.16  | 39.82  | 225.43 | 0.0445  |
| ENSG00000136720.6  | HS6ST1        | 1.21 | 60.37  | 23.29  | 123.76 | 0.0454  |
| ENSG00000188130.9  | MAPK12        | 1.29 | 51.40  | 65.20  | 1.23   | 0.0202  |
| ENSG00000133250.9  | ZNF414        | 1.31 | 0.32   | 0.00   | 24.34  | 0.0045  |
| ENSG00000160352.11 | ZNF714        | 1.32 | 0.24   | 0.00   | 0.97   | 0.0136  |
| ENSG00000172725.9  | CORO1B        | 1.34 | 1.67   | 19.94  | 1.33   | 0.0099  |
| ENSG00000236526.1  | RP4-742J24.2  | 1.35 | 12.53  | 1.22   | 0.00   | 0.0318  |
| ENSG00000150712.6  | MTMR12        | 1.35 | 5.44   | 6.96   | 0.39   | 0.02425 |
| ENSG00000074527.7  | NTN4          | 1.36 | 22.30  | 203.79 | 47.63  | 0.03745 |
| ENSG00000197016.7  | ZNF470        | 1.52 | 0.08   | 0.13   | 4.08   | 0.0473  |
| ENSG00000164338.5  | UTP15         | 1.56 | 2.37   | 1.61   | 57.46  | 0.0041  |
| ENSG00000206560.6  | ANKRD28       | 1.66 | 65.12  | 5.10   | 79.01  | 0.006   |
| ENSG00000075539.9  | FRYL          | 1.85 | 170.14 | 5.05   | 44.67  | 0.02035 |
| ENSG00000268093.1  | AC022154.7    | 1.88 | 1.09   | 0.00   | 0.50   | 0.0292  |
| ENSG00000125962.10 | ARMCX5        | 1.92 | 0.11   | 1.52   | 59.32  | 0.03555 |
| ENSG00000129911.4  | KLF16         | 1.93 | 3.55   | 0.99   | 32.26  | 0.04305 |
| ENSG00000164877.14 | MICALL2       | 1.96 | 62.11  | 32.67  | 229.73 | 0.0311  |
| ENSG00000257647.1  | RP11-701H24.3 | 2.00 | 0.94   | 0.00   | 10.99  | 0.02645 |
| ENSG00000115966.12 | ATF2          | 2.09 | 7.12   | 41.34  | 5.69   | 0.0267  |
| ENSG00000160216.14 | AGPAT3        | 2.12 | 4.83   | 5.54   | 47.29  | 0.02025 |
| ENSG00000256525.2  | POLG2         | 2.16 | 10.31  | 0.43   | 15.15  | 0.0276  |
| ENSG00000149929.11 | HIRIP3        | 2.26 | 4.78   | 25.38  | 0.03   | 0.0474  |
| ENSG00000174684.6  | B3GNT1        | 2.30 | 39.47  | 17.05  | 105.05 | 0.0474  |
| ENSG00000105559.7  | PLEKHA4       | 2.40 | 28.99  | 8.83   | 83.57  | 0.02915 |
| ENSG00000187609.11 | EXD3          | 2.49 | 30.13  | 4.28   | 118.89 | 0.00825 |
| ENSG00000185046.14 | ANKS1B        | 2.49 | 0.51   | 0.44   | 0.00   | 0.0165  |
| ENSG00000184381.14 | PLA2G6        | 2.51 | 0.19   | 0.00   | 1.43   | 0.00255 |
| ENSG00000136436.10 | CALCOCO2      | 2.66 | 22.13  | 46.79  | 333.30 | 0.0178  |
| ENSG00000213918.6  | DNASE1        | 2.66 | 8.69   | 16.15  | 1.03   | 0.04625 |

|                    |               |      |       |       |        |          |
|--------------------|---------------|------|-------|-------|--------|----------|
| ENSG00000161395.8  | PGAP3         | 2.77 | 4.93  | 0.68  | 54.65  | 0.03815  |
| ENSG00000204196.4  | AC011737.2    | 2.78 | 2.52  | 0.75  | 99.18  | 0.02925  |
| ENSG00000103111.10 | MON1B         | 2.83 | 22.08 | 44.23 | 1.76   | 0.0113   |
| ENSG00000269279.1  | AL136376.1    | 2.91 | 4.08  | 0.00  | 5.41   | 0.01205  |
| ENSG00000139579.8  | NABP2         | 2.94 | 6.26  | 0.77  | 47.39  | 0.03925  |
| ENSG00000154370.9  | TRIM11        | 3.17 | 9.59  | 0.73  | 30.51  | 0.0225   |
| ENSG00000104081.9  | BMF           | 3.20 | 0.45  | 0.03  | 47.46  | 3.00E-04 |
| ENSG00000145012.8  | LPP           | 3.56 | 10.43 | 10.98 | 120.27 | 0.0096   |
| ENSG00000113716.8  | HMGXB3        | 3.67 | 1.67  | 0.70  | 31.38  | 0.02915  |
| ENSG00000241258.2  | CRCP          | 3.73 | 38.44 | 21.51 | 2.48   | 0.0467   |
| ENSG00000198380.8  | GFPT1         | 3.79 | 4.53  | 9.62  | 93.28  | 0.0223   |
| ENSG00000166912.12 | MTMR10        | 3.90 | 8.82  | 5.29  | 33.69  | 0.0355   |
| ENSG00000267542.1  | RP11-697E22.1 | 3.95 | 11.63 | 12.97 | 0.00   | 0.0377   |
| ENSG00000253251.2  | CTC-534A2.2   | 4.15 | 5.41  | 0.00  | 3.86   | 0.04345  |
| ENSG00000138035.10 | PNPT1         | 4.37 | 0.72  | 0.87  | 19.99  | 0.0243   |
| ENSG00000105321.8  | CCDC9         | 4.37 | 0.02  | 1.11  | 0.00   | 0.007    |
| ENSG00000103260.4  | METRNL        | 4.43 | 48.99 | 2.57  | 133.57 | 0.008    |
| ENSG00000269388.1  | AC018755.16   | 4.48 | 0.00  | 0.00  | 1.31   | 0.0316   |
| ENSG00000198954.4  | KIAA1279      | 4.61 | 19.18 | 8.65  | 70.08  | 0.0416   |
| ENSG00000075420.8  | FNDC3B        | 4.80 | 20.14 | 40.04 | 230.59 | 0.0327   |
| ENSG00000157353.12 | FUK           | 4.81 | 5.11  | 0.47  | 34.19  | 0.0492   |
| ENSG00000256904.1  | A2ML1-AS2     | 4.91 | 0.00  | 0.00  | 1.29   | 0.01695  |
| ENSG00000177873.8  | ZNF619        | 5.02 | 0.02  | 0.00  | 1.40   | 0.0155   |
| ENSG00000125846.11 | ZNF133        | 5.12 | 2.29  | 0.71  | 34.67  | 0.00535  |
| ENSG00000118518.11 | RNF146        | 5.16 | 7.44  | 10.78 | 121.79 | 0.01285  |
| ENSG00000160055.15 | TMEM234       | 5.22 | 0.97  | 6.59  | 0.19   | 0.04965  |
| ENSG00000132004.8  | FBXW9         | 5.31 | 21.06 | 2.55  | 67.37  | 0.03545  |
| ENSG00000131724.6  | IL13RA1       | 5.32 | 9.09  | 21.38 | 4.19   | 0.0234   |
| ENSG00000196810.4  | CTBP1-AS2     | 5.33 | 14.28 | 0.12  | 82.99  | 0.00365  |
| ENSG00000186862.13 | PDZD7         | 5.49 | 1.83  | 0.15  | 4.38   | 0.04035  |
| ENSG00000243335.4  | KCTD7         | 5.51 | 0.13  | 0.36  | 13.44  | 0.0414   |
| ENSG00000078246.11 | TULP3         | 5.68 | 4.64  | 5.79  | 194.84 | 0.02755  |
| ENSG00000198055.6  | GRK6          | 5.69 | 1.72  | 0.07  | 5.69   | 0.03345  |
| ENSG00000149930.13 | TAOK2         | 6.12 | 3.42  | 0.55  | 14.52  | 0.0332   |
| ENSG00000140367.7  | UBE2Q2        | 6.24 | 16.84 | 3.26  | 21.11  | 0.04405  |
| ENSG00000175866.11 | BAIAP2        | 6.27 | 3.32  | 57.96 | 4.18   | 0.00785  |
| ENSG00000167257.6  | RNF214        | 6.44 | 4.30  | 1.46  | 15.98  | 0.02625  |
| ENSG00000175567.4  | UCP2          | 6.48 | 0.00  | 0.00  | 1.83   | 0.02095  |
| ENSG00000033178.8  | UBA6          | 6.52 | 24.99 | 7.56  | 61.16  | 0.01225  |
| ENSG00000157456.3  | CCNB2         | 6.99 | 0.00  | 0.00  | 1.33   | 0.04925  |
| ENSG00000145860.7  | RNF145        | 7.09 | 17.06 | 7.28  | 92.04  | 0.03475  |
| ENSG00000146243.9  | IRAK1BP1      | 7.16 | 1.61  | 6.18  | 0.07   | 0.03085  |
| ENSG00000130669.13 | PAK4          | 7.20 | 2.21  | 13.55 | 0.93   | 0.02925  |

|                    |         |       |        |        |         |          |
|--------------------|---------|-------|--------|--------|---------|----------|
| ENSG00000180881.15 | CAPS2   | 7.38  | 0.45   | 0.10   | 18.70   | 0.00205  |
| ENSG00000079739.11 | PGM1    | 7.57  | 15.02  | 30.84  | 179.18  | 0.03445  |
| ENSG00000108830.7  | RND2    | 7.63  | 0.00   | 0.00   | 0.58    | 0.04305  |
| ENSG00000168528.7  | SERINC2 | 8.13  | 12.66  | 23.44  | 193.70  | 0.03645  |
| ENSG00000131196.13 | NFATC1  | 8.17  | 2.59   | 0.93   | 47.76   | 8.00E-04 |
| ENSG00000131791.6  | PRKAB2  | 8.24  | 10.26  | 10.18  | 69.19   | 0.0279   |
| ENSG00000176105.9  | YES1    | 8.75  | 7.29   | 5.68   | 33.89   | 0.0442   |
| ENSG00000100479.8  | POLE2   | 8.90  | 5.62   | 11.80  | 0.00    | 0.0459   |
| ENSG00000124782.15 | RREB1   | 8.96  | 25.10  | 1.97   | 89.52   | 0.02475  |
| ENSG00000151746.9  | BICD1   | 9.06  | 1.76   | 0.61   | 11.99   | 0.02745  |
| ENSG00000110422.7  | HIPK3   | 9.20  | 10.84  | 5.34   | 24.44   | 0.049    |
| ENSG00000168758.6  | SEMA4C  | 9.32  | 0.83   | 0.40   | 0.00    | 0.01885  |
| ENSG00000107779.7  | BMPRI1A | 9.82  | 2.90   | 1.69   | 13.06   | 0.0123   |
| ENSG00000117713.13 | ARID1A  | 9.88  | 5.75   | 2.74   | 27.83   | 0.0214   |
| ENSG00000151348.9  | EXT2    | 9.93  | 57.52  | 38.28  | 9.35    | 0.03815  |
| ENSG00000001631.10 | KRIT1   | 10.04 | 7.02   | 5.06   | 134.21  | 0.0125   |
| ENSG00000177885.9  | GRB2    | 10.04 | 88.12  | 31.28  | 338.39  | 0.03615  |
| ENSG00000131323.10 | TRAF3   | 10.26 | 3.50   | 3.35   | 0.07    | 0.028    |
| ENSG00000110075.10 | PPP6R3  | 10.72 | 23.86  | 16.20  | 87.31   | 0.024    |
| ENSG00000163935.9  | SFMBT1  | 11.68 | 2.11   | 0.21   | 89.49   | 0.01245  |
| ENSG00000006468.9  | ETV1    | 11.78 | 0.00   | 0.00   | 8.05    | 5.00E-05 |
| ENSG00000184347.10 | SLIT3   | 11.81 | 12.31  | 16.97  | 171.65  | 0.04765  |
| ENSG00000119689.10 | DLST    | 11.92 | 1.88   | 30.21  | 0.07    | 0.00345  |
| ENSG00000181027.6  | FKRP    | 12.13 | 4.73   | 1.48   | 106.76  | 0.04255  |
| ENSG00000113312.6  | TTC1    | 12.40 | 126.88 | 354.60 | 72.10   | 0.023    |
| ENSG00000177943.9  | MAMDC4  | 12.55 | 7.26   | 0.00   | 1.00    | 0.0257   |
| ENSG00000105127.4  | AKAP8   | 12.66 | 15.52  | 1.54   | 38.75   | 0.02535  |
| ENSG00000125459.10 | MSTO1   | 12.88 | 1.59   | 0.19   | 5.84    | 0.0181   |
| ENSG00000161202.13 | DVL3    | 12.95 | 18.30  | 2.19   | 51.52   | 0.01915  |
| ENSG00000121152.5  | NCAPH   | 14.46 | 0.00   | 0.00   | 63.91   | 0.01595  |
| ENSG00000156970.8  | BUB1B   | 14.58 | 0.00   | 0.06   | 2.81    | 0.047    |
| ENSG00000138190.12 | EXOC6   | 14.73 | 0.09   | 0.10   | 10.43   | 0.0127   |
| ENSG00000153250.13 | RBMS1   | 15.14 | 144.93 | 48.51  | 235.58  | 0.01575  |
| ENSG00000124155.12 | PIGT    | 15.15 | 109.11 | 95.81  | 353.88  | 0.04185  |
| ENSG00000196526.6  | AFAP1   | 15.19 | 26.76  | 5.47   | 92.03   | 0.0186   |
| ENSG00000170310.10 | STX8    | 16.50 | 40.57  | 267.05 | 1088.17 | 0.0152   |
| ENSG00000145014.13 | TMEM44  | 18.58 | 28.86  | 14.34  | 0.73    | 0.0469   |
| ENSG00000088833.13 | NSFL1C  | 18.81 | 16.25  | 87.23  | 9.00    | 0.042    |
| ENSG00000127580.11 | WDR24   | 19.13 | 6.16   | 0.35   | 36.69   | 0.04805  |
| ENSG00000196313.7  | POM121  | 19.33 | 2.06   | 0.11   | 39.20   | 0.0261   |
| ENSG00000103168.12 | TAF1C   | 19.36 | 21.51  | 0.89   | 26.80   | 0.0283   |
| ENSG00000135506.11 | OS9     | 19.36 | 68.85  | 29.56  | 242.73  | 0.02475  |
| ENSG00000113734.13 | BNIP1   | 19.53 | 2.07   | 21.33  | 0.67    | 0.04895  |

|                    |          |       |        |        |         |         |
|--------------------|----------|-------|--------|--------|---------|---------|
| ENSG00000164543.5  | STK17A   | 19.79 | 2.70   | 3.01   | 74.86   | 0.0051  |
| ENSG00000163006.7  | CCDC138  | 20.21 | 0.19   | 0.25   | 0.00    | 0.0038  |
| ENSG00000151657.7  | KIN      | 20.34 | 66.80  | 11.57  | 124.07  | 0.0316  |
| ENSG00000126787.8  | DLGAP5   | 20.49 | 0.00   | 0.00   | 0.62    | 0.01385 |
| ENSG00000137942.12 | FBNP1L   | 20.80 | 14.61  | 6.42   | 36.33   | 0.04555 |
| ENSG00000158195.6  | WASF2    | 20.87 | 99.75  | 79.55  | 679.26  | 0.03235 |
| ENSG00000243725.2  | TTC4     | 21.15 | 4.71   | 9.86   | 78.68   | 0.02515 |
| ENSG00000168916.11 | ZNF608   | 21.36 | 5.43   | 0.00   | 0.85    | 0.00165 |
| ENSG00000133812.10 | SBF2     | 21.42 | 45.34  | 39.90  | 6.14    | 0.0488  |
| ENSG00000106012.13 | IQCE     | 21.84 | 55.60  | 3.61   | 47.81   | 0.0439  |
| ENSG00000139971.11 | C14orf37 | 22.26 | 9.61   | 1.15   | 50.49   | 0.0086  |
| ENSG00000138867.12 | GUCD1    | 22.36 | 48.68  | 10.17  | 224.51  | 0.04415 |
| ENSG00000267228.2  | IER3IP1  | 22.96 | 32.14  | 7.42   | 0.00    | 0.01955 |
| ENSG00000176390.10 | CRLF3    | 23.22 | 3.67   | 0.06   | 6.89    | 0.00585 |
| ENSG00000101290.9  | CDS2     | 23.78 | 0.94   | 51.41  | 3.45    | 0.03045 |
| ENSG00000165030.3  | NFIL3    | 23.84 | 32.66  | 30.14  | 219.23  | 0.0146  |
| ENSG00000198363.11 | ASPH     | 23.84 | 230.74 | 326.46 | 97.56   | 0.019   |
| ENSG00000062650.13 | WAPAL    | 24.14 | 56.28  | 9.24   | 121.79  | 0.02625 |
| ENSG00000172273.8  | HINFP    | 24.42 | 16.38  | 0.06   | 0.26    | 0.04175 |
| ENSG00000224019.1  | RPL21P32 | 24.50 | 0.00   | 0.00   | 173.08  | 0.0054  |
| ENSG00000145194.13 | ECE2     | 24.63 | 33.05  | 0.18   | 16.46   | 0.04065 |
| ENSG00000141985.5  | SH3GL1   | 24.78 | 49.28  | 15.28  | 145.87  | 0.01315 |
| ENSG00000157895.7  | C12orf43 | 25.94 | 44.58  | 1.25   | 15.65   | 0.00735 |
| ENSG00000138663.4  | COPS4    | 26.31 | 22.05  | 31.53  | 202.21  | 0.0262  |
| ENSG00000169504.10 | CLIC4    | 26.70 | 140.30 | 205.12 | 48.45   | 0.01695 |
| ENSG00000132676.11 | DAP3     | 27.14 | 114.80 | 48.07  | 317.13  | 0.01545 |
| ENSG00000103275.14 | UBE2I    | 28.48 | 34.42  | 17.49  | 91.88   | 0.0274  |
| ENSG00000122482.16 | ZNF644   | 28.54 | 18.23  | 27.17  | 3.57    | 0.04385 |
| ENSG00000127946.12 | HIP1     | 29.77 | 5.83   | 3.13   | 75.14   | 0.0379  |
| ENSG00000118260.10 | CREB1    | 31.96 | 4.70   | 42.52  | 3.49    | 0.0027  |
| ENSG00000152413.10 | HOMER1   | 32.53 | 4.81   | 1.83   | 90.78   | 0.00105 |
| ENSG00000090686.11 | USP48    | 33.75 | 118.84 | 39.13  | 133.69  | 0.0307  |
| ENSG00000075131.5  | TIPIN    | 33.93 | 1.21   | 0.17   | 3.45    | 0.0392  |
| ENSG00000124574.10 | ABCC10   | 34.82 | 0.80   | 5.09   | 0.00    | 0.02555 |
| ENSG00000136153.15 | LMO7     | 35.40 | 384.16 | 247.03 | 1215.23 | 0.0112  |
| ENSG00000034677.7  | RNF19A   | 37.93 | 22.98  | 13.14  | 163.02  | 0.03895 |
| ENSG00000063244.8  | U2AF2    | 38.77 | 3.04   | 15.08  | 1.20    | 0.043   |
| ENSG00000152942.14 | RAD17    | 39.05 | 6.99   | 5.55   | 158.97  | 0.0465  |
| ENSG00000113658.12 | SMAD5    | 39.06 | 60.62  | 18.06  | 251.89  | 0.04935 |
| ENSG00000066923.13 | STAG3    | 41.21 | 1.55   | 0.00   | 2.21    | 0.0047  |
| ENSG00000010318.15 | PHF7     | 44.31 | 5.43   | 0.00   | 3.88    | 0.012   |
| ENSG00000157500.6  | APPL1    | 44.31 | 62.47  | 47.78  | 4.28    | 0.01785 |
| ENSG00000144524.13 | COPS7B   | 45.83 | 34.73  | 7.04   | 73.72   | 0.00975 |
| ENSG00000116679.11 | IVNS1ABP | 46.20 | 33.51  | 14.92  | 125.37  | 0.01845 |
| ENSG00000134363.7  | FST      | 46.86 | 248.92 | 116.59 | 481.74  | 0.0361  |



|                    |               |        |        |        |        |          |
|--------------------|---------------|--------|--------|--------|--------|----------|
| ENSG00000168724.10 | DNAJC21       | 47.19  | 158.17 | 33.90  | 356.35 | 0.0107   |
| ENSG00000081320.6  | STK17B        | 47.87  | 21.00  | 65.30  | 6.08   | 0.02835  |
| ENSG00000077782.15 | FGFR1         | 53.88  | 115.95 | 47.08  | 226.61 | 0.019    |
| ENSG00000131037.10 | EPS8L1        | 54.02  | 0.00   | 0.00   | 68.85  | 5.00E-05 |
| ENSG00000100796.13 | SMEK1         | 54.56  | 29.85  | 9.80   | 113.19 | 0.007    |
| ENSG00000112576.8  | CCND3         | 56.84  | 12.85  | 41.94  | 216.48 | 0.04555  |
| ENSG00000077312.4  | SNRPA         | 57.78  | 5.97   | 3.16   | 100.41 | 0.0107   |
| ENSG00000038382.13 | TRIO          | 58.79  | 62.20  | 10.88  | 116.43 | 0.0124   |
| ENSG00000117616.13 | C1orf63       | 59.63  | 357.82 | 133.16 | 732.99 | 0.0166   |
| ENSG00000112531.12 | QKI           | 61.47  | 6.84   | 5.88   | 47.98  | 0.0346   |
| ENSG00000185864.12 | NPIP4         | 61.65  | 24.39  | 3.66   | 36.08  | 0.0051   |
| ENSG00000140632.12 | GLYR1         | 62.41  | 25.16  | 3.82   | 127.73 | 9.00E-04 |
| ENSG00000064607.12 | SUGP2         | 66.35  | 40.94  | 18.89  | 2.14   | 0.03335  |
| ENSG00000163697.12 | APBB2         | 68.17  | 9.71   | 44.92  | 5.15   | 0.0026   |
| ENSG00000100836.6  | PABPN1        | 68.71  | 136.49 | 36.31  | 186.46 | 0.0399   |
| ENSG00000214021.11 | TTLL3         | 70.98  | 33.52  | 2.43   | 439.85 | 0.0016   |
| ENSG00000103091.10 | WDR59         | 76.24  | 8.34   | 2.46   | 55.56  | 0.04075  |
| ENSG00000242114.1  | MTFP1         | 76.61  | 0.00   | 1.52   | 147.89 | 0.0217   |
| ENSG00000116809.7  | ZBTB17        | 79.34  | 10.40  | 1.01   | 30.96  | 0.0256   |
| ENSG00000054654.11 | SYNE2         | 81.62  | 2.70   | 0.50   | 3.68   | 0.0446   |
| ENSG00000145016.9  | KIAA0226      | 89.15  | 11.86  | 9.78   | 139.03 | 0.0266   |
| ENSG00000109920.8  | FNBP4         | 92.79  | 42.91  | 33.64  | 230.39 | 0.0158   |
| ENSG00000119048.3  | UBE2B         | 103.42 | 39.37  | 100.96 | 682.64 | 0.0443   |
| ENSG00000172889.11 | EGFL7         | 106.66 | 0.63   | 1.09   | 230.19 | 0.01655  |
| ENSG00000101115.8  | SALL4         | 106.90 | 5.55   | 0.00   | 74.06  | 5.00E-05 |
| ENSG00000089006.12 | SNX5          | 107.25 | 102.70 | 44.24  | 405.60 | 0.01565  |
| ENSG00000223745.3  | RP4-717I23.3  | 108.07 | 11.50  | 55.98  | 5.28   | 0.029    |
| ENSG00000078808.12 | SDF4          | 111.39 | 113.08 | 19.25  | 419.99 | 0.0034   |
| ENSG00000150753.7  | CCT5          | 114.70 | 49.14  | 79.81  | 294.12 | 0.0456   |
| ENSG00000074054.13 | CLASP1        | 116.42 | 4.10   | 21.39  | 548.20 | 0.0067   |
| ENSG00000176022.3  | B3GALT6       | 121.05 | 36.08  | 29.74  | 238.61 | 0.0345   |
| ENSG00000118058.16 | KMT2A         | 131.38 | 28.29  | 9.16   | 86.35  | 0.0133   |
| ENSG00000157110.11 | RBPM5         | 135.68 | 51.42  | 17.47  | 188.47 | 0.01675  |
| ENSG00000114857.13 | NKTR          | 137.91 | 92.83  | 23.91  | 169.09 | 0.0072   |
| ENSG00000197122.7  | SRC           | 140.76 | 2.22   | 0.25   | 8.21   | 0.02595  |
| ENSG00000163714.13 | U2SURP        | 151.90 | 162.07 | 42.15  | 384.12 | 0.0478   |
| ENSG00000184465.11 | WDR27         | 159.07 | 5.88   | 0.34   | 23.27  | 4.00E-04 |
| ENSG00000118420.12 | UBE3D         | 164.38 | 2.03   | 3.43   | 0.00   | 0.01815  |
| ENSG00000078674.13 | PCM1          | 168.30 | 78.81  | 20.62  | 277.38 | 0.0087   |
| ENSG00000227540.1  | RP11-152N13.5 | 192.77 | 0.00   | 0.00   | 3.80   | 0.03325  |
| ENSG00000088448.10 | ANKRD10       | 203.31 | 220.78 | 22.86  | 349.50 | 0.00545  |

|                    |         |         |          |         |         |         |
|--------------------|---------|---------|----------|---------|---------|---------|
| ENSG00000167508.6  | MVD     | 206.88  | 29.59    | 1.56    | 103.48  | 0.0225  |
| ENSG00000113013.8  | HSPA9   | 212.44  | 86.01    | 70.16   | 304.00  | 0.02625 |
| ENSG00000111215.7  | PRR4    | 216.81  | 153.65   | 62.96   | 0.91    | 0.0136  |
| ENSG00000101104.8  | PABPC1L | 217.65  | 0.20     | 6.83    | 140.08  | 0.04645 |
| ENSG00000108395.9  | TRIM37  | 221.03  | 46.46    | 9.74    | 142.01  | 0.00515 |
| ENSG00000129932.3  | DOHH    | 231.87  | 3.48     | 0.74    | 0.00    | 0.0136  |
| ENSG00000091136.9  | LAMB1   | 235.00  | 123.61   | 46.18   | 317.48  | 0.0161  |
| ENSG00000168000.10 | BSCL2   | 262.44  | 172.02   | 41.28   | 475.11  | 0.0411  |
| ENSG00000103855.13 | CD276   | 263.15  | 70.14    | 43.84   | 307.87  | 0.0259  |
| ENSG00000076242.10 | MLH1    | 351.00  | 1.09     | 12.59   | 179.35  | 0.00955 |
| ENSG00000164292.8  | RHOBTB3 | 360.56  | 48.32    | 128.06  | 23.71   | 0.0216  |
| ENSG00000132589.11 | FLOT2   | 506.43  | 122.30   | 66.52   | 257.29  | 0.0479  |
| ENSG00000117523.11 | PRRC2C  | 584.21  | 187.20   | 62.17   | 380.76  | 0.04055 |
| ENSG00000111642.10 | CHD4    | 826.30  | 694.96   | 78.30   | 1169.69 | 0.0155  |
| ENSG00000100401.15 | RANGAP1 | 896.77  | 106.57   | 36.05   | 257.91  | 0.03255 |
| ENSG00000141002.14 | TCF25   | 1709.60 | 676.19   | 229.02  | 1118.74 | 0.03775 |
| ENSG00000198804.2  | MT-CO1  | 2186.47 | 10593.20 | 1150.07 | 6626.71 | 0.0111  |
| ENSG00000101361.10 | NOP56   | 2251.98 | 158.79   | 31.64   | 220.42  | 0.04485 |
| ENSG00000214548.10 | MEG3    | 3738.76 | 600.30   | 96.15   | 384.80  | 0.02685 |
