# Supplementary material for: Novel live cell fluorescent probe for human-induced pluripotent stem cells highlights early reprogramming population
Source: PubMed Central journal article supplement (PMC7866770; doi:10.1186/s13287-021-02171-6), 2021-02-05
Supplement: 13287_2021_2171_MOESM10_ESM.pdf [file 13287_2021_2171_MOESM10_ESM.pdf]

**Table S2:** Real time qPCR primers

| <b>Gene</b>      | <b>Forward 5' to 3'</b>  | <b>Reverse 5' to 3'</b>  |
|------------------|--------------------------|--------------------------|
| <i>GAPDH</i>     | CAAGGTCATCCATGACAACCTTTG | GGCCATCCACAGTCTTCTGG     |
| <i>Activin A</i> | CTCGGAGATCATCACGTTTG     | CCTTGGAATCTCGAAGTGC      |
| <i>LIN28</i>     | GAAGCGCAGATCAAAAGGAG     | GCTGATGCTCTGGCAGAAGT     |
| <i>Nanog</i>     | CCAACATCCTGAACCTCAGC     | GCTATTCTTCGGCCAGTTG      |
| <i>DPPA2</i>     | TGGTGTCAACAACCTCGGTTTG   | CTCGAACATCGCTGTAATCTGG   |
| <i>TGF-β1</i>    | GCAGCACGTGGAGCTGTA       | CAGCCGTTGCTGAGGTA        |
| <i>FN1</i>       | CTGGCCGAAAATACATTGTA     | CCACAGTCGGGTCAGGAG       |
| <i>DNMT3B</i>    | TACACAGACGTGTCCAACATGGGC | GGATGCCTTCAGGAATCACACCTC |
| <i>GDF3</i>      | AAATGTTTGTGTTGCGGTCA     | TCTGGCACAGGTGTCTTCAG     |
| <i>Cdh1</i>      | GAAGGTGACAGAGCCTCTGGAT   | GATCGGTTACCGTGATCAAAATC  |
| <i>EpCAM1</i>    | TGTGTGCGTGGGA            | TTCAAGATTGGTAAAGCCAGT    |
| <i>ZEB1</i>      | AGCAGTGAAAGAGAAGGGAATGC  | GGTCCTCTTCAGGTGCCTCAG    |
| <i>ZEB2</i>      | CGCAGCACATGAATCACAGG     | CGTATCGTTTCGGGATCCGT     |
| <i>Snail1</i>    | TCTGAGGCCAAGGATCTCCA     | CATTCGGGAGAAGGTCCGAG     |
| <i>Snail2</i>    | TCATCTTTGGGGCGAGTGAG     | TCCTTGAAGCAACCAGGGTC     |
| <i>CREB1</i>     | ATTGGAAGGAAAGGGGAGGG     | GGCTTGAACACATCTTGGA      |
| <i>PRKAB2</i>    | CAGTAGAGTGGGGCAGGAAA     | TCCCATTTCACATCTGGGCT     |
| <i>GATA2</i>     | AAGGCTCGTTCCTGTTTCCAGA   | GGCATTGCACAGGTAGTGG      |
| <i>SOX7</i>      | GAGCAGTGTGGACACGTACC     | GTCCAGGGGAGACATTTTCCAG   |
| <i>SMA</i>       | CTGTTCCAGCCATCCTTCAT     | TCATGATGCTGTTGTAGGTGGT   |
| <i>AFP</i>       | AAGAATTTTCAGCATGATTTTCCA | CACCCACTTCATGGTTGCTA     |
